# Supplementary material for: Kinetically controlled hierarchical self-assemblies of all-trans-retinoic acid on Au(111)
Source: Royal Society of Chemistry journal article supplement (doi:10.1039/c6cc08148g), 2017-01-01
Supplement: c6cc08148g1.pdf [file c6cc08148g1.pdf]

## SUPPORTING INFORMATION FOR

### Kinetically controlled hierarchical self-assemblies of *all-trans*-retinoic acid on Au(111)

Chao Li,<sup>a</sup> Na Li,<sup>a</sup> Liwei Liu,<sup>a</sup> Yajie Zhang,<sup>a</sup> Chenyang Yuan,<sup>a</sup> Lianmao Peng,<sup>a</sup> Shimin Hou,<sup>ab</sup> and Yongfeng Wang<sup>✉ab</sup>

<sup>a</sup>Key Laboratory for the Physics and Chemistry of Nanodevices, Department of Electronics, Peking University, Beijing 100871, China

<sup>b</sup>Peking University Information Technology Institute (Tianjin Binhai), Tianjin 300457, China

✉E-mail: yongfengwang@pku.edu.cn.

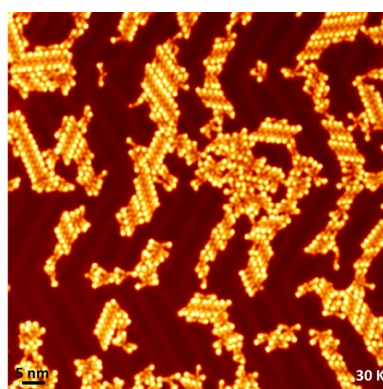

**Figure S1.** STM image of the 30 K prepared ReA/Au(111). When the ReA molecules were deposited onto the Au(111) substrate at around 30 K, both striped islands formed by dimers and disordered structures were observed

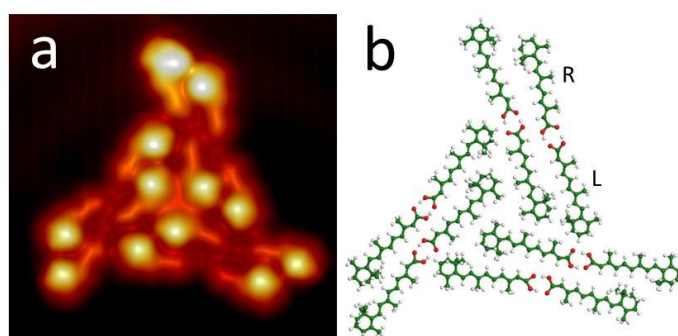

**Figure S2.** High-resolution STM image of a dodecamer (a) and its corresponding molecular model (b). The chirality of two ReA molecules of a dimer is labeled nearby.

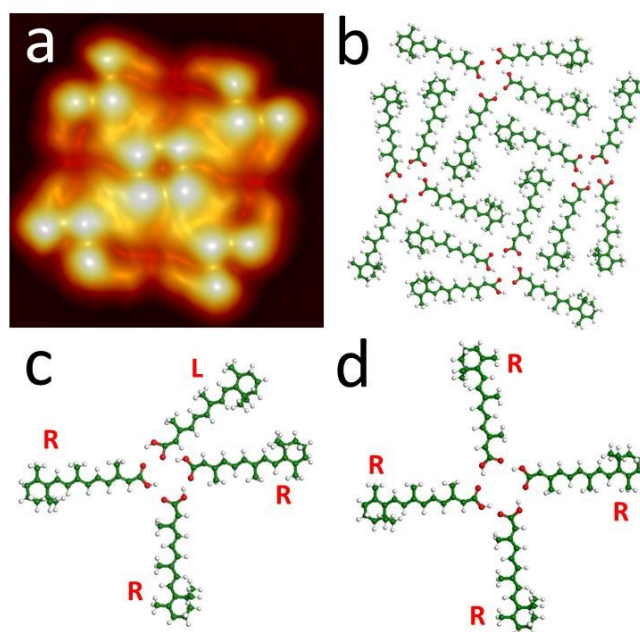

**Figure S3.** High-resolution STM image of a hexadecamer (a) and its corresponding molecular model (b). The chirality of four ReA molecules of a tetramer in the hexadecamers (c) and tetramer patterns (d) is labeled nearby.

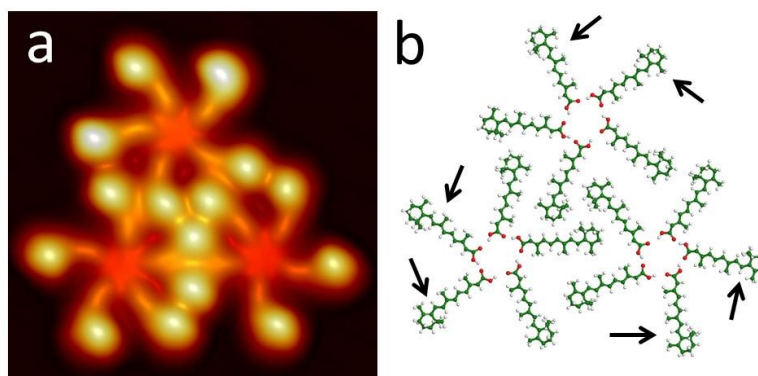

**Figure S4.** High-resolution STM image of a pentadecamer (a) and its corresponding molecular model (b). Six ReA molecules pointed by the black arrows in the pentadecamer only interact with adjacent ReA molecules through O...H-O hydrogen bonds.

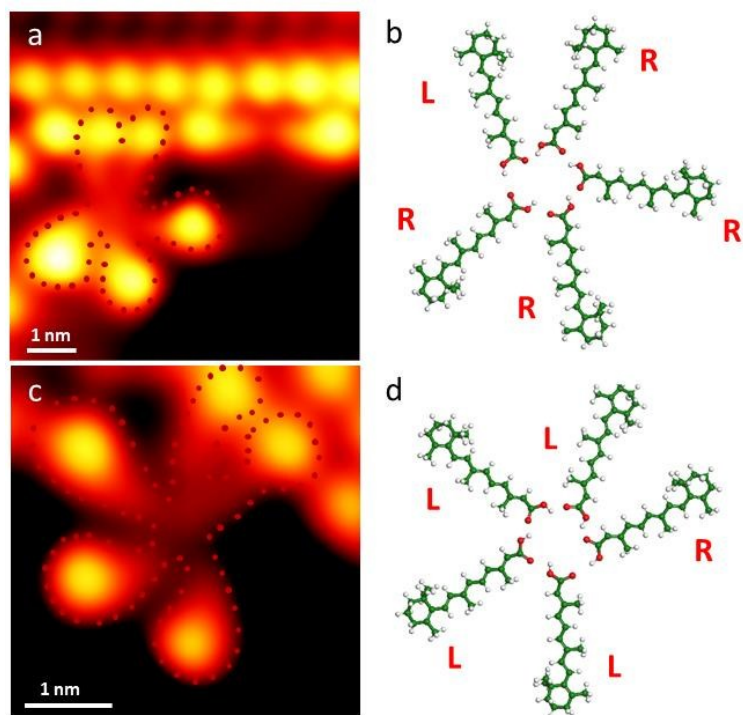

**Figure S5.** High-resolution STM images of two pentamers on Ag(111) (**a, c**) and their corresponding molecular models (**b, d**). The chirality of ReA molecules in pentamers is labeled nearby.
